# Supplementary material for: Lipid biomarkers in Holocene and glacial sediments from ancient Lake Ohrid (Macedonia, Albania)
Source: Copernicus journal article supplement (doi:10.5194/bg-7-3473-2010), 2010-11-08
Supplement: Supplementary file 1 [file bg-7-3473-2010-supplement.pdf]

**supplementary data (Holtvoeth et al., Biomarkers in Lake Ohrid)**

all compounds quantified in total lipid extracts from sites Lz1120 and Co1202  
given as percentages of the total of quantified lipids (%<sub>lipids</sub>)

| <b>core</b>                                         | <b>Lz1120</b> | <b>Lz1120</b> | <b>Lz1120</b> | <b>Lz1120</b> | <b>Lz1120</b> | <b>Lz1120</b> | <b>Co1202</b> | <b>Co1202</b> | <b>Co1202</b> |
|-----------------------------------------------------|---------------|---------------|---------------|---------------|---------------|---------------|---------------|---------------|---------------|
| <b>sample</b>                                       | <b>1</b>      | <b>399</b>    | <b>483</b>    | <b>505</b>    | <b>517</b>    | <b>643</b>    | <b>246</b>    | <b>248</b>    | <b>252</b>    |
| age (cal. ka BP)                                    | -0.050        | 5.330         | 7.530         | 8.167         | 8.526         | 18.900        | 7.723         | 7.797         | 7.945         |
| TOC (%)                                             | 2.0           | 2.1           | 2.0           | 1.7           | 2.2           | 0.6           | 1.6           | 0.6           | 0.8           |
| N <sub>tot</sub> (%)                                | 0.3           | 0.2           | 0.2           | 0.2           | 0.3           | 0.1           | 0.2           | 0.1           | 0.1           |
| C <sub>org</sub> /N <sub>tot</sub>                  | 9             | 12            | 10            | 8             | 10            | 6             | 9             | 6             | 7             |
| S <sub>tot</sub> (%)                                | 0.09          | 0.09          | 0.07          | 0.07          | 0.07          | 0.05          | 0.15          | 0.13          | 0.13          |
| C <sub>org</sub> /S <sub>tot</sub>                  | 59            | 62            | 77            | 24            | 83            | 33            | 28            | 11            | 17            |
| CaCO <sub>3</sub> (%)                               | 5             | 61            | 59            | 35            | 48            | 0             | 39            | 1             | 9             |
| total lipids (µg/g <sub>Sed.</sub> )                | 6.6           | 6.4           | 4.0           | 2.1           | 4.6           | 0.3           | 1.4           | 0.6           | 1.0           |
| <b>lipid fractions (%<sub>lipids</sub>)</b>         |               |               |               |               |               |               |               |               |               |
| <i>n</i> -alkanoic acids (FA)                       | 30.1          | 39.9          | 32.6          | 22.6          | 41.4          | 24.6          | 63.4          | 26.7          | 62.4          |
| hydroxy acids (OH-FA)                               | 1.0           | 4.7           | 3.7           | 2.7           | 3.7           | 5.9           | 1.3           | 1.1           | 0.2           |
| branched alkanoic acids                             | 2.8           | 0.6           | 0.4           | 0.9           | 0.9           | -             | -             | -             | -             |
| mono-unsaturated alkenoic acids                     | 12.2          | 0.2           | -             | 0.04          | 0.2           | -             | -             | -             | -             |
| <i>n</i> -alkanols (OH)                             | 18.0          | 31.6          | 22.8          | 44.8          | 28.2          | 43.2          | 25.9          | 56.0          | 28.3          |
| <i>n</i> -alkanes                                   | 2.3           | 1.6           | 2.4           | 2.1           | 1.5           | 9.7           | 2.0           | 3.0           | 2.1           |
| sterols                                             | 24.8          | 12.1          | 25.4          | 20.2          | 14.2          | 11.0          | 5.4           | 9.9           | 4.7           |
| others                                              | 8.8           | 9.2           | 12.7          | 6.6           | 9.8           | 5.5           | 2.0           | 3.3           | 2.2           |
| <b><i>n</i>-alkanoic acids (%<sub>lipids</sub>)</b> |               |               |               |               |               |               |               |               |               |
| C <sub>13</sub> FA                                  | -             | -             | 0.1           | -             | -             | -             | -             | -             | -             |
| C <sub>14</sub> FA                                  | 2.1           | 1.4           | 0.5           | 1.3           | 0.9           | -             | 1.8           | 2.0           | 0.4           |
| C <sub>15</sub> FA                                  | 0.5           | 0.8           | 0.2           | 0.2           | 0.4           | -             | 0.8           | 0.5           | -             |
| C <sub>16</sub> FA                                  | 6.6           | 10.5          | 3.2           | 9.8           | 7.1           | 1.8           | 18.0          | 10.3          | 4.6           |
| C <sub>17</sub> FA                                  | 0.6           | 0.4           | 0.2           | 0.3           | 0.3           | 0.2           | -             | -             | -             |
| C <sub>18</sub> FA                                  | 2.1           | 0.7           | 1.0           | 2.1           | 1.8           | 0.7           | 5.6           | 2.9           | 1.6           |
| C <sub>19</sub> FA                                  | 0.2           | 0.1           | 0.2           | -             | 0.1           | 0.1           | 0.4           | -             | 0.2           |
| C <sub>20</sub> FA                                  | 1.4           | 0.7           | 1.1           | 1.6           | 1.7           | 1.1           | 2.1           | 2.4           | 1.9           |
| C <sub>21</sub> FA                                  | 0.4           | 0.2           | 0.4           | 0.1           | 0.3           | 0.5           | 0.6           | -             | 0.4           |
| C <sub>22</sub> FA                                  | 2.9           | 2.3           | 3.4           | 2.3           | 4.0           | 1.2           | 6.1           | 2.1           | 4.6           |
| C <sub>23</sub> FA                                  | 0.8           | 0.6           | 0.7           | 0.2           | 0.9           | 0.8           | 0.9           | 0.2           | 1.1           |
| C <sub>24</sub> FA                                  | 5.1           | 5.7           | 6.3           | 2.1           | 7.2           | 4.1           | 6.5           | 2.6           | 9.4           |

| core sample                                                | Lz1120<br>1 | Lz1120<br>399 | Lz1120<br>483 | Lz1120<br>505 | Lz1120<br>517 | Lz1120<br>643 | Co1202<br>246 | Co1202<br>248 | Co1202<br>252 |
|------------------------------------------------------------|-------------|---------------|---------------|---------------|---------------|---------------|---------------|---------------|---------------|
| <b><i>n</i>-alkanoic acids (%<sub>lipids</sub>), cont.</b> |             |               |               |               |               |               |               |               |               |
| C <sub>25</sub> FA                                         | 0.4         | 0.7           | 0.7           | 0.1           | 0.6           | 1.4           | 0.9           | 0.1           | 1.6           |
| C <sub>26</sub> FA                                         | 4.0         | 7.0           | 6.3           | 1.1           | 7.1           | 4.5           | 7.4           | 1.8           | 13.5          |
| C <sub>27</sub> FA                                         | 0.2         | 0.6           | 0.5           | 0.0           | 0.4           | 0.9           | 0.7           | 0.1           | 1.5           |
| C <sub>28</sub> FA                                         | 2.0         | 4.7           | 4.9           | 0.5           | 4.2           | 3.6           | 6.2           | 0.8           | 12.5          |
| C <sub>29</sub> FA                                         | 0.1         | 0.4           | 0.3           | 0.0           | 0.4           | 0.8           | 0.6           | -             | 1.3           |
| C <sub>30</sub> FA                                         | 0.7         | 2.6           | 2.0           | 0.7           | 2.7           | 2.2           | 3.5           | 0.6           | 5.8           |
| C <sub>31</sub> FA                                         | -           | 0.1           | 0.1           | 0.0           | 0.3           | 0.2           | 0.2           | -             | 0.6           |
| C <sub>32</sub> FA                                         | -           | 0.4           | 0.4           | 0.1           | 1.1           | 0.5           | 1.0           | 0.4           | 1.4           |
| <b>hydroxy acids (%<sub>lipids</sub>)</b>                  |             |               |               |               |               |               |               |               |               |
| ω-C <sub>12</sub> OH-FA                                    | -           | 0.08          | 0.18          | 0.11          | -             | 0.38          | -             | -             | -             |
| ω-C <sub>14</sub> OH-FA                                    | 0.10        | 0.32          | 0.38          | 0.24          | 0.53          | 0.06          | 0.08          | -             | -             |
| α-C <sub>16</sub> OH-FA                                    | -           | -             | -             | 0.31          | 0.09          | -             | 0.04          | -             | -             |
| ω-C <sub>16</sub> OH-FA                                    | 0.31        | 0.83          | 0.82          | 0.40          | 0.97          | 0.49          | 0.21          | 0.30          | 0.10          |
| unknown                                                    | -           | -             | 0.09          | -             | 0.03          | -             | -             | -             | -             |
| α-C <sub>18</sub> OH-FA                                    | -           | -             | 0.12          | 0.50          | 0.19          | -             | 0.09          | 0.21          | -             |
| α-C <sub>18:1</sub> OH-FA                                  | -           | -             | -             | 0.10          | 0.05          | -             | -             | -             | -             |
| ω-C <sub>18</sub> OH-FA                                    | -           | 0.05          | 0.05          | -             | 0.04          | 0.14          | -             | -             | -             |
| ω-C <sub>20</sub> OH-FA                                    | 0.09        | 0.17          | 0.16          | 0.06          | 0.12          | 0.70          | 0.09          | 0.09          | 0.10          |
| α-C <sub>22</sub> OH-FA                                    | -           | -             | -             | 0.21          | -             | -             | -             | -             | -             |
| ω-C <sub>22</sub> OH-FA                                    | 0.49        | 1.07          | 0.78          | 0.20          | 0.48          | 1.42          | 0.17          | 0.15          | 0.04          |
| α-C <sub>24</sub> OH-FA                                    | -           | -             | -             | 0.44          | 0.05          | -             | -             | 0.22          | -             |
| ω-C <sub>24</sub> OH-FA                                    | -           | 1.22          | 0.81          | 0.11          | 0.45          | 1.75          | 0.24          | 0.08          | -             |
| α-C <sub>24</sub> OH-FA                                    | -           | -             | -             | 0.09          | -             | -             | -             | -             | -             |
| ω-C <sub>26</sub> OH-FA                                    | -           | 0.60          | 0.36          | -             | 0.38          | 0.72          | 0.17          | -             | -             |
| ω-C <sub>28</sub> OH-FA                                    | -           | 0.41          | -             | -             | 0.35          | 0.27          | 0.18          | -             | -             |
| <b>branched alkanolic acids (%<sub>lipids</sub>)</b>       |             |               |               |               |               |               |               |               |               |
| <i>iso</i> -C <sub>15:0</sub>                              | 0.82        | 0.27          | 0.15          | 0.15          | 0.17          | -             | -             | -             | -             |
| <i>anteiso</i> -C <sub>15:0</sub>                          | 0.89        | 0.35          | 0.23          | 0.68          | 0.69          | -             | -             | -             | -             |
| <i>iso</i> -C <sub>16:0</sub>                              | -           | -             | -             | -             | 0.08          | -             | -             | -             | -             |
| <i>anteiso</i> -C <sub>16:0</sub>                          | 0.30        | -             | -             | -             | -             | -             | -             | -             | -             |
| <i>iso</i> -C <sub>17:0</sub>                              | 0.32        | -             | -             | -             | -             | -             | -             | -             | -             |
| <i>anteiso</i> -C <sub>17:0</sub>                          | 0.33        | -             | -             | -             | -             | -             | -             | -             | -             |
| <i>i/a</i> ?-C <sub>18:0</sub>                             | 0.10        | -             | -             | 0.11          | -             | -             | -             | -             | -             |

| core sample                                     | Lz1120<br>1 | Lz1120<br>399 | Lz1120<br>483 | Lz1120<br>505 | Lz1120<br>517 | Lz1120<br>643 | Co1202<br>246 | Co1202<br>248 | Co1202<br>252 |
|-------------------------------------------------|-------------|---------------|---------------|---------------|---------------|---------------|---------------|---------------|---------------|
| <b>mono-unsaturated FA (%<sub>lipids</sub>)</b> |             |               |               |               |               |               |               |               |               |
| C <sub>16:1</sub> FA                            | 9.42        | -             | -             | -             | -             | -             | -             | -             | -             |
| C <sub>18:1</sub> FA                            | 2.81        | 0.23          | -             | 0.04          | 0.18          | -             | -             | -             | -             |
| <b><i>n</i>-alkanols (%<sub>lipids</sub>)</b>   |             |               |               |               |               |               |               |               |               |
| C <sub>12</sub> OH                              | 0.15        | -             | 0.08          | 0.31          | 0.16          | -             | 0.47          | 0.57          | 0.05          |
| C <sub>13</sub> OH                              | 0.05        | -             | 0.03          | 0.12          | 0.03          | -             | 0.13          | 0.28          | 0.03          |
| C <sub>14</sub> OH                              | 0.87        | 0.07          | 0.05          | 0.32          | 0.18          | -             | 0.69          | 1.24          | 0.30          |
| C <sub>15</sub> OH                              | 0.66        | -             | -             | -             | -             | -             | 0.30          | -             | -             |
| C <sub>16</sub> OH                              | 1.27        | 0.08          | 0.11          | -             | 0.28          | 0.40          | 1.33          | 1.97          | 0.43          |
| C <sub>17</sub> OH                              | 0.26        | -             | 0.05          | -             | 0.08          | 0.14          | -             | -             | -             |
| C <sub>18</sub> OH                              | 0.46        | 0.14          | 0.14          | 0.52          | 0.26          | 0.55          | 0.61          | 1.47          | 0.34          |
| C <sub>19</sub> OH                              | 0.15        | -             | 0.05          | 0.12          | 0.07          | 0.12          | 0.15          | 0.17          | 0.09          |
| C <sub>20</sub> OH                              | 0.91        | 0.57          | 0.47          | 1.06          | 0.61          | 0.85          | 0.64          | 1.46          | 0.55          |
| C <sub>21</sub> OH                              | 0.34        | 0.11          | 0.14          | 0.23          | 0.10          | 0.53          | 0.17          | 0.23          | 0.17          |
| C <sub>22</sub> OH                              | 4.36        | 5.82          | 3.24          | 4.16          | 2.44          | 11.34         | 3.36          | 7.56          | 3.92          |
| C <sub>23</sub> OH                              | 0.52        | 0.61          | 0.39          | 0.74          | 0.42          | 1.23          | 0.46          | 0.97          | 0.51          |
| C <sub>24</sub> OH                              | 2.10        | 6.63          | 5.41          | 9.15          | 5.36          | 8.25          | 4.96          | 9.76          | 5.31          |
| C <sub>25</sub> OH                              | 0.20        | 0.75          | 0.50          | 1.00          | 0.54          | 1.11          | 0.81          | 1.71          | 0.80          |
| C <sub>26</sub> OH                              | 2.32        | 6.28          | 5.09          | 9.41          | 5.83          | 8.41          | 4.39          | 10.60         | 5.90          |
| C <sub>27</sub> OH                              | 0.19        | 0.46          | 0.37          | 0.83          | 0.32          | 0.67          | 0.47          | 1.15          | 0.64          |
| C <sub>28</sub> OH                              | 1.58        | 6.20          | 4.29          | 10.23         | 7.28          | 4.78          | 4.12          | 8.86          | 4.78          |
| C <sub>29</sub> OH                              | 0.24        | 0.27          | 0.29          | 0.67          | 0.42          | 0.95          | 0.42          | 1.05          | 0.53          |
| C <sub>30</sub> OH                              | 1.34        | 2.26          | 1.40          | 4.51          | 3.15          | 2.09          | 1.75          | 5.00          | 2.90          |
| C <sub>31</sub> OH                              | -           | 0.27          | 0.18          | 0.30          | 0.12          | 0.51          | 0.18          | 0.46          | 0.26          |
| C <sub>32</sub> OH                              | -           | 1.03          | 0.52          | 1.10          | 0.55          | 1.27          | 0.51          | 1.48          | 0.74          |
| <b><i>n</i>-alkanes (%<sub>lipids</sub>)</b>    |             |               |               |               |               |               |               |               |               |
| <i>n</i> -C <sub>21</sub>                       | 0.46        | 0.13          | 0.36          | 0.13          | -             | 0.46          | 0.06          | -             | 0.06          |
| <i>n</i> -C <sub>23</sub>                       | 0.34        | 0.06          | 0.18          | 0.11          | 0.08          | 0.68          | 0.17          | 0.31          | 0.13          |
| <i>n</i> -C <sub>25</sub>                       | 0.16        | 0.12          | 0.04          | 0.18          | 0.14          | 1.09          | 0.29          | 0.41          | 0.20          |
| <i>n</i> -C <sub>27</sub>                       | 0.34        | 0.41          | 0.47          | 0.35          | 0.25          | 2.05          | 0.39          | 0.56          | 0.36          |
| <i>n</i> -C <sub>28</sub>                       | -           | -             | -             | -             | -             | -             | -             | -             | 0.08          |
| <i>n</i> -C <sub>29</sub>                       | 0.55        | 0.50          | 0.73          | 0.75          | 0.51          | 2.96          | 0.54          | 0.89          | 0.64          |
| <i>n</i> -C <sub>31</sub>                       | 0.50        | 0.35          | 0.62          | 0.61          | 0.47          | 2.50          | 0.55          | 0.87          | 0.62          |

| <b>core sample</b>                                 | <b>Lz1120<br/>1</b> | <b>Lz1120<br/>399</b> | <b>Lz1120<br/>483</b> | <b>Lz1120<br/>505</b> | <b>Lz1120<br/>517</b> | <b>Lz1120<br/>643</b> | <b>Co1202<br/>246</b> | <b>Co1202<br/>248</b> | <b>Co1202<br/>252</b> |
|----------------------------------------------------|---------------------|-----------------------|-----------------------|-----------------------|-----------------------|-----------------------|-----------------------|-----------------------|-----------------------|
| <b>sterols (%<sub>lipids</sub>)</b>                |                     |                       |                       |                       |                       |                       |                       |                       |                       |
| coprostanol                                        | 0.75                | -                     | -                     | -                     | 0.11                  | -                     | -                     | -                     | -                     |
| epicholestanol                                     | 0.64                | 0.25                  | 0.70                  | 0.34                  | 0.22                  | -                     | -                     | 0.12                  | -                     |
| epicoprostanol                                     | 0.77                | -                     | -                     | -                     | -                     | -                     | -                     | -                     | -                     |
| cholesterol                                        | 5.93                | 2.10                  | 3.00                  | 1.80                  | 1.63                  | 1.08                  | 0.60                  | 1.85                  | 0.58                  |
| cholestanol                                        | 3.38                | 1.08                  | 2.92                  | 1.98                  | 0.91                  | 2.06                  | 0.52                  | 0.78                  | 0.19                  |
| C28 $\Delta$ 0                                     | -                   | -                     | -                     | 0.84                  | -                     | -                     | -                     | -                     | -                     |
| stigmasterol                                       | 2.21                | 0.62                  | 0.92                  | 0.33                  | 0.29                  | -                     | -                     | -                     | -                     |
| C29 $\Delta$ 22                                    | -                   | -                     | -                     | 0.41                  | 0.27                  | -                     | -                     | -                     | -                     |
| sitosterol                                         | 4.65                | 2.55                  | 5.43                  | 2.07                  | 2.14                  | 4.48                  | 0.85                  | 1.80                  | 1.58                  |
| stigmastanol                                       | 3.42                | 2.59                  | 2.12                  | 5.00                  | 2.81                  | 3.38                  | 1.06                  | 1.60                  | 0.86                  |
| dinosterol                                         | -                   | -                     | 1.98                  | 1.01                  | 1.39                  | -                     | 0.38                  | 0.38                  | 0.19                  |
| dinostanol                                         | 1.18                | -                     | 3.07                  | 1.42                  | 1.40                  | -                     | 1.30                  | 2.09                  | 0.98                  |
| lanosterol                                         | 1.82                | 2.94                  | 5.26                  | 5.03                  | 3.06                  | 0.01                  | 0.67                  | 1.24                  | 0.33                  |
| <b>others (%<sub>lipids</sub>)</b>                 |                     |                       |                       |                       |                       |                       |                       |                       |                       |
| branched C <sub>15</sub> OH ( <i>iso</i> )         | 0.66                | 0.09                  | 0.22                  | 0.44                  | -                     | -                     | -                     | -                     | -                     |
| branched C <sub>15</sub> OH ( <i>anteiso</i> )     | 0.39                | 0.07                  | 0.16                  | 0.21                  | -                     | -                     | -                     | -                     | -                     |
| phytodiene                                         | 1.43                | 0.58                  | 1.20                  | -                     | 0.36                  | 0.37                  | -                     | -                     | -                     |
| $\beta$ -amyrin                                    | 0.20                | 0.42                  | 0.73                  | 0.93                  | 0.57                  | 0.59                  | 0.24                  | 0.92                  | -                     |
| tetrahymanol                                       | 1.87                | 0.64                  | 1.17                  | 1.26                  | 0.69                  | 0.18                  | 0.08                  | 0.13                  | 0.04                  |
| branched C <sub>31</sub> OH ?                      | -                   | -                     | -                     | -                     | 1.14                  | -                     | -                     | -                     | 0.32                  |
| 17 $\beta$ (H),21 $\beta$ (H)-bishomohopanol       | 0.48                | 1.39                  | -                     | 1.29                  | 0.71                  | 0.43                  | 0.18                  | 0.35                  | 0.10                  |
| 17 $\beta$ (H),21 $\beta$ (H)-bishomohopanoic acid | 3.14                | 6.02                  | 9.17                  | 2.43                  | 6.38                  | 2.76                  | 1.49                  | 1.92                  | 1.78                  |
| branched C <sub>16</sub> OH                        | 0.46                | 0.02                  | -                     | -                     | -                     | -                     | -                     | -                     | -                     |
| branched C <sub>17</sub> OH ( <i>iso</i> )         | 0.17                | -                     | -                     | -                     | -                     | -                     | -                     | -                     | -                     |
| branched C <sub>17</sub> OH ( <i>anteiso</i> )     | 0.05                | -                     | -                     | -                     | -                     | -                     | -                     | -                     | -                     |
| branched C <sub>22</sub> OH                        | -                   | -                     | -                     | -                     | -                     | 1.13                  | -                     | -                     | -                     |
